# Supplementary material for: Rh(III)-catalyzed directed C–H bond amidation of ferrocenes with isocyanates
Source: publisher site journal article supplement (doi:10.3762/bjoc.8.212), 2012-10-29
Supplement: Additional file 1 [file 1860-5397-8-212-S1.pdf]

# Supporting Information

## for

### Rh(III)-catalyzed directed C–H bond amidation of ferrocenes with isocyanates

Satoshi Takebayashi, Tsubasa Shizuno, Takashi Otani, and Takanori Shibata\*

Address: Department of Chemistry and Biochemistry, School of Advanced Science and Engineering, Waseda University, Okubo, Shinjuku, Tokyo, 169-8555, Japan

Email: Takanori Shibata\* - tshibata@waseda.jp

\* Corresponding author

#### Experimental procedures and physical properties of new compounds

**Materials and methods.** All catalytic reactions were carried out under an argon atmosphere by using oven-dried Schlenk tubes equipped with a magnetic stir bar and a J. Young valve. All solvents were used after degassing with argon. Chloroform-*d* was obtained from Cambridge Isotope Laboratories, and was used as received. THF was dried by using a solvent-drying unit.  $[\text{RhCp}^*\text{Cl}_2]_2$  was purchased from Umicore. Ferrocenyl imine **1a** was prepared by following a reported procedure [1]. Common chemicals were purchased from Aldrich, TCI, Strem, Wako Pure Chemical Industries Ltd., and Kanto Chemical Co., and were used as received unless stated otherwise. Flash column chromatography was performed on silica gel (Kanto Chemical Co. 60 N 40–50  $\mu\text{m}$ ). Preparative TLC was carried out on silica gel (Merck 60 GF254). NMR spectra were measured on a JEOL ECS400 (400 MHz) spectrometer.  $^1\text{H}$  and  $^{13}\text{C}$  NMR chemical shifts are reported in parts per million ( $\delta$ ) relative to TMS with the residual solvent signal as the internal reference (7.26 and 77.16 ppm for  $^1\text{H}$  and  $^{13}\text{C}$  NMR, respectively). Abbreviations for NMR spectra are s (singlet), d

(doublet), t (triplet), q (quartet), dd (doublet of doublet), dsept (doublet of septet), m (multiplet), and br (broad). IR spectra were recorded on a JASCO FT/IR-4100 spectrophotometer, and are reported in frequency of absorption ( $\text{cm}^{-1}$ ). Low-resolution mass spectra (LRMS) were measured on a JEOL GCMateII by using the FAB method. High-resolution mass spectra (HRMS) were measured on a JEOL JMS-T100 CS by using the ESI method or on a JEOL JMS-SX102A by using the FAB method. Optical rotations were measured on a JASCO DIP-370 polarimeter.

**Preparation of  $[\text{RhCp}^*(\text{OAc})_2(\text{H}_2\text{O})]$  [2].** Under argon,  $[\text{RhCp}^*\text{Cl}_2]_2$  (103.1 mg, 0.167 mmol), AgOAc (137.0 mg, 0.821 mmol), and 7 mL of toluene were placed in a Schlenk tube equipped with a magnetic stir bar. The suspension was stirred for 30 min at 75 °C and  $[\text{RhCp}^*\text{Cl}_2]_2$  was completely dissolved to form a red solution and a white precipitate of AgCl. The silver salt was filtered by using  $\text{CH}_2\text{Cl}_2$ . The red solution was concentrated to form an orange solid of  $[\text{RhCp}^*(\text{OAc})_2(\text{H}_2\text{O})]$ . Yield: 119.1 mg, 95%.

**Typical procedure for the amidation of ferrocene derivatives.**  $[\text{RhCp}^*(\text{OAc})_2(\text{H}_2\text{O})]$  (1.9 mg, 0.005 mmol), appropriate ferrocene derivatives **1** (0.10 mmol), and solid isocyanates were placed in an oven-dried Schlenk tube equipped with a magnetic stir bar and a J. Young valve. Air in the tube was then replaced by argon by three vacuum–argon refill cycles. In the case of liquid isocyanates, they were added to the tube using a microliter syringe. THF (0.5 mL) was then added to the tube to form a clear red solution.  $\text{HBF}_4 \cdot \text{OEt}_2$  (1.4  $\mu\text{L}$ , 0.010 mmol) was then added to the tube by using a microliter syringe, and washed down by THF (0.5 mL). The tube was then closed by a J. Young valve, and heated at 75 °C in an oil bath. The reaction mixture was stirred at 75 °C for the reaction time described in Tables 1–3. The reaction mixture was then cooled to room temperature. Five drops of 1 N HCl were then added to the tube to hydrolyze the imine. The mixture was stirred for 30 min at room temperature, concentrated under vacuum, and purified using preparative TLC (20 cm  $\times$  20 cm) eluted with a 2:1 mixture of hexanes and ethyl acetate.

**1-Acetyl-2-[(phenylamino)carbonyl]ferrocene (2a).** Red oil.  $^1\text{H}$  NMR (399.78 MHz,  $\text{CDCl}_3$ , 24.6 °C):  $\delta$  2.61 (3H, s, Me), 4.33 (5H, s,  $\text{C}_5\text{H}_5$ ), 4.83 (1H, s,  $\text{C}_5\text{H}_3$ ), 4.96 (1H, s,  $\text{C}_5\text{H}_3$ ), 5.68 (1H, s,  $\text{C}_5\text{H}_3$ ), 7.12 (1H, t,  $J = 8.2$  Hz, aromatic CH), 7.38 (2H, t,  $J = 8.2$  Hz, aromatic CH), 7.84 (2H, d,  $J = 8.2$  Hz, aromatic CH), 12.24 (1H, s, NH);  $^{13}\text{C}\{^1\text{H}\}$  NMR (99.54 MHz,  $\text{CDCl}_3$ , 24.9 °C):  $\delta$  28.8 (Me), 72.0 ( $\text{C}_5\text{H}_5$ ), 73.7 ( $\text{C}_5\text{H}_3$ ), 74.6 ( $\text{C}_5\text{H}_3$ ), 78.9 ( $\text{C}_5\text{H}_3$ ), 79.3 ( $\text{C}_5\text{H}_3$ ), 119.9 (aromatic), 123.5 (aromatic), 128.9 (aromatic), 139.3 (aromatic), 166.5 (CONH), 206.6 (COMe) (one signal was not detected due to overlapping with solvent peak); IR ( $\text{CH}_2\text{Cl}_2$  cast film): 3009, 1671, 1269, 693, 506  $\text{cm}^{-1}$ ; HRMS-ESI ( $m/z$ ):  $[\text{M} + \text{Na}]^+$  calcd for  $\text{C}_{19}\text{H}_{17}\text{FeNNaO}_2$ , 368.0553; found: 368.0547.

**1-Acetyl-2-[(4-methoxyphenyl)amino]carbonyl]ferrocene (2b).** Red oil.  $^1\text{H}$  NMR (399.78 MHz,  $\text{CDCl}_3$ , 24.6 °C):  $\delta$  2.57 (3H, s, Me), 3.80 (3H, s, OMe), 4.29 (5H, s,  $\text{C}_5\text{H}_5$ ), 4.78 (1H, s,  $\text{C}_5\text{H}_3$ ), 4.91 (1H, s,  $\text{C}_5\text{H}_3$ ), 5.63 (1H, s,  $\text{C}_5\text{H}_3$ ), 6.89 (2H, d,  $J = 8.8$  Hz, aromatic CH), 7.72 (2H, d,  $J = 8.8$  Hz, aromatic CH), 12.10 (1H,

s, *NH*);  $^{13}\text{C}\{^1\text{H}\}$  NMR (99.54 MHz,  $\text{CDCl}_3$ , 24.9 °C):  $\delta$  28.8 (Me), 55.5 (OMe), 72.0 ( $\text{C}_5\text{H}_5$ ), 73.6 ( $\text{C}_5\text{H}_3$ ), 74.5 ( $\text{C}_5\text{H}_3$ ), 77.2 ( $\text{C}_5\text{H}_3$ ), 79.0 ( $\text{C}_5\text{H}_3$ ), 79.2 ( $\text{C}_5\text{H}_3$ ), 114.1 (aromatic), 121.2 (aromatic), 132.6 (aromatic), 155.8 (aromatic), 166.1 (CONH), 206.6 (COMe); IR ( $\text{CH}_2\text{Cl}_2$  cast film): 3003, 1662, 1623, 1510, 1241  $\text{cm}^{-1}$ ; HRMS-ESI ( $m/z$ ):  $[\text{M} + \text{Na}]^+$  calcd for  $\text{C}_{20}\text{H}_{19}\text{FeNNaO}_3$ , 398.0659; found: 398.0640.

**1-Acetyl-2-[[4-chlorophenyl]amino]carbonyl]ferrocene (2c).** Red oil.  $^1\text{H}$  NMR (399.78 MHz,  $\text{CDCl}_3$ , 23.7 °C):  $\delta$  2.58 (3H, s, Me), 4.30 (5H, s,  $\text{C}_5\text{H}_5$ ), 4.81 (1H, s,  $\text{C}_5\text{H}_3$ ), 4.94 (1H, d,  $J = 2.4$  Hz,  $\text{C}_5\text{H}_3$ ), 5.63 (1H, s,  $\text{C}_5\text{H}_3$ ), 7.30 (2H, d,  $J = 8.8$  Hz, aromatic CH), 7.75 (2H, d,  $J = 8.8$  Hz, aromatic CH), 12.31 (1H, s, *NH*);  $^{13}\text{C}\{^1\text{H}\}$  NMR (99.54 MHz,  $\text{CDCl}_3$ , 23.7 °C):  $\delta$  28.9 (Me), 72.1 ( $\text{C}_5\text{H}_5$ ), 74.0 ( $\text{C}_5\text{H}_3$ ), 74.6 ( $\text{C}_5\text{H}_3$ ), 77.5 ( $\text{C}_5\text{H}_3$ ), 78.6 ( $\text{C}_5\text{H}_3$ ), 79.4 ( $\text{C}_5\text{H}_3$ ), 121.1 (aromatic), 128.4 (aromatic), 129.0 (aromatic), 137.9 (aromatic), 166.9 (CONH), 206.9 (COMe); IR ( $\text{CH}_2\text{Cl}_2$  cast film): 2994, 2363, 1640, 1617, 1492  $\text{cm}^{-1}$ ; HRMS-ESI ( $m/z$ ):  $[\text{M} + \text{Na}]^+$  calcd for  $\text{C}_{19}\text{H}_{16}\text{ClFeNNaO}_2$ , 404.0117; found: 404.0102.

**1-Acetyl-2-[[phenylmethyl]amino]carbonyl]ferrocene (2d).** Red oil.  $^1\text{H}$  NMR (399.78 MHz,  $\text{CDCl}_3$ , 24.7 °C):  $\delta$  2.50 (3H, s, Me), 4.19 (5H, s,  $\text{C}_5\text{H}_5$ ), 4.40–4.61 (2H, m, Bn), 4.70 (1H, s,  $\text{C}_5\text{H}_3$ ), 4.84 (1H, s,  $\text{C}_5\text{H}_3$ ), 5.24 (1H, s,  $\text{C}_5\text{H}_3$ ), 7.11–7.36 (5H, m, aromatic CH), 10.50 (1H, s, *NH*);  $^{13}\text{C}\{^1\text{H}\}$  NMR (99.54 MHz,  $\text{CDCl}_3$ , 25.0 °C):  $\delta$  28.8 (Me), 43.6 (Bn), 71.8 ( $\text{C}_5\text{H}_5$ ), 73.3 ( $\text{C}_5\text{H}_3$ ), 74.8 ( $\text{C}_5\text{H}_3$ ), 76.9 ( $\text{C}_5\text{H}_3$ ), 78.1 ( $\text{C}_5\text{H}_3$ ), 79.0 ( $\text{C}_5\text{H}_3$ ), 127.0 (aromatic), 127.7 (aromatic), 128.5 (aromatic), 139.1 (aromatic), 168.4 (CONH), 205.8 (COMe); IR ( $\text{CH}_2\text{Cl}_2$  cast film): 3320, 1655, 1569, 1411, 697  $\text{cm}^{-1}$ ; HRMS-ESI ( $m/z$ ):  $[\text{M} + \text{Na}]^+$  calcd for  $\text{C}_{20}\text{H}_{19}\text{FeNNaO}_2$ , 382.0710; found: 382.0696.

**1-Acetyl-2-[(*n*-butylamino)carbonyl]ferrocene (2e).** Brownish-red oil.  $^1\text{H}$  NMR (399.78 MHz,  $\text{CDCl}_3$ , 26.2 °C):  $\delta$  0.98 (3H, d,  $J = 7.2$  Hz, Me Bu), 1.41–1.66 (4H, m,  $\text{CH}_2$  Bu), 2.54 (3H, s, COMe), 3.31–3.48 (2H, m,  $\text{NCH}_2$ ), 4.26 (5H, s,  $\text{C}_5\text{H}_5$ ), 4.71 (1H, brs,  $\text{C}_5\text{H}_3$ ), 4.86 (1H, brs,  $\text{C}_5\text{H}_3$ ), 5.56 (1H, brs,  $\text{C}_5\text{H}_3$ ), 10.00 (1H, s, *NH*);  $^{13}\text{C}\{^1\text{H}\}$  NMR (99.54 MHz,  $\text{CDCl}_3$ , 26.2 °C):  $\delta$  13.9 (Me Bu), 20.3 ( $\text{CH}_2$  Bu), 28.9 ( $\text{COCH}_3$ ), 31.6 ( $\text{CH}_2$  Bu), 39.3 ( $\text{CH}_2$  Bu), 71.8 ( $\text{C}_5\text{H}_5$ ), 73.1 ( $\text{C}_5\text{H}_3$ ), 74.8 ( $\text{C}_5\text{H}_3$ ), 76.8 ( $\text{C}_5\text{H}_3$ ), 78.7 ( $\text{C}_5\text{H}_3$ ), 79.0 ( $\text{C}_5\text{H}_3$ ), 168.0 (CONH), 205.8 (COMe); IR ( $\text{CH}_2\text{Cl}_2$  cast film): 1957, 1655, 1570, 1412, 826  $\text{cm}^{-1}$ ; HRMS-FAB ( $m/z$ ):  $[\text{M} + \text{H}]^+$  calcd for  $\text{C}_{17}\text{H}_{21}\text{FeNO}_2$ , 327.0922; found: 327.0920.

**1-Acetyl-2-[(cyclohexylamino)carbonyl]ferrocene (2f).** Red oil.  $^1\text{H}$  NMR (399.78 MHz,  $\text{CDCl}_3$ , 22.0 °C):  $\delta$  1.22–1.84 (10H, m, Cy), 2.53 (3H, s, Me), 3.88–3.96 (1H, m,  $\text{NCH}$ ), 4.24 (5H, s,  $\text{C}_5\text{H}_5$ ), 4.70 (1H, t,  $J = 2.8$  Hz,  $\text{C}_5\text{H}_3$ ), 4.85 (1H, dd,  $J = 2.7, 2.8$  Hz,  $\text{C}_5\text{H}_3$ ), 5.55 (1H, dd,  $J = 2.7, 2.8$  Hz,  $\text{C}_5\text{H}_3$ ), 10.03 (1H, s, *NH*);  $^{13}\text{C}\{^1\text{H}\}$  NMR (99.54 MHz,  $\text{CDCl}_3$ , 22.2 °C):  $\delta$  24.6 (Cy  $\times$  2), 25.8 (Cy), 28.9 (Me), 32.5 (Cy), 33.1 (Cy), 48.0 (Cy), 71.8 ( $\text{C}_5\text{H}_5$ ), 73.2 ( $\text{C}_5\text{H}_3$ ), 74.8 ( $\text{C}_5\text{H}_3$ ), 76.8 ( $\text{C}_5\text{H}_3$ ), 79.0 ( $\text{C}_5\text{H}_3$ ), 167.0 (CONH), 206.9 (COMe) (one signal was not detected due to overlapping with solvent peak); IR ( $\text{CH}_2\text{Cl}_2$  cast film): 2929, 1655, 1568, 1412, 1249  $\text{cm}^{-1}$ ; HRMS-ESI ( $m/z$ ):  $[\text{M} + \text{Na}]^+$  calcd for  $\text{C}_{19}\text{H}_{23}\text{FeNNaO}_2$ , 374.1022; found: 374.1015.

**(S)-1-[(4S)-4,5-dihydro-4-isopropyl-2-oxazolyl]-2-[(phenylamino)carbonyl]ferrocene (3a).** Red oil.  $^1\text{H}$  NMR (399.78 MHz,  $\text{CDCl}_3$ , 24.6 °C):  $\delta$  1.07 (3H, d,  $J$  = 6.8 Hz, Me), 1.13 (3H, d,  $J$  = 6.8 Hz, Me), 2.00–2.08 (1H, m,  $\text{CHMe}_2$ ), 4.19–4.24 (2H, m, oxazoline), 4.27 (5H, s,  $\text{C}_5\text{H}_5$ ), 4.34–4.40 (1H, m, oxazoline), 4.62 (1H, t,  $J$  = 2.7 Hz,  $\text{C}_5\text{H}_3$ ), 4.94 (1H, t,  $J$  = 2.1 Hz,  $\text{C}_5\text{H}_3$ ), 5.46 (1H, t,  $J$  = 2.2 Hz,  $\text{C}_5\text{H}_3$ ), 7.11 (1H, t,  $J$  = 7.4 Hz, aromatic CH), 7.36 (2H, t,  $J$  = 7.5 Hz, aromatic CH), 7.78 (2H, d,  $J$  = 7.7 Hz, aromatic CH), 13.27 (1H, s, NH);  $^{13}\text{C}\{^1\text{H}\}$  NMR (99.54 MHz,  $\text{CDCl}_3$ , 24.8 °C):  $\delta$  18.3 (Me), 19.3 (Me), 32.6 (CH), 66.4 ( $\text{C}_5\text{H}_3$ ), 69.7 ( $\text{CH}_2$  oxazoline), 71.6 (CH oxazoline), 71.8 ( $\text{C}_5\text{H}_5$ ), 72.3 ( $\text{C}_5\text{H}_3$ ), 74.9 ( $\text{C}_5\text{H}_3$ ), 76.7 ( $\text{C}_5\text{H}_3$ ), 120.6 (aromatic), 123.7 (aromatic), 129.1 (aromatic), 140.1 (aromatic), 167.5 (CON), 168.3 (CON) (one carbon signal was not detected due to overlapping with solvent peak); IR ( $\text{CH}_2\text{Cl}_2$  cast film): 2960, 1649, 1317, 1004, 761  $\text{cm}^{-1}$ ; HRMS-ESI ( $m/z$ ):  $[\text{M} + \text{H}]^+$  calcd for  $\text{C}_{23}\text{H}_{25}\text{FeN}_2\text{O}_2$ , 415.1312; found: 415.1310;  $[\alpha]_{\text{D}}^{23}$  –123.7 ( $c$  0.52,  $\text{CHCl}_3$ ).

**(S)-1-[(4S)-4,5-Dihydro-4-isopropyl-2-oxazolyl]-2-[(4-methoxyphenyl)amino]carbonyl]ferrocene (3b).** Red oil.  $^1\text{H}$  NMR (399.78 MHz,  $\text{CDCl}_3$ , 24.5 °C):  $\delta$  1.05 (3H, d,  $J$  = 6.8 Hz, Me), 1.08 (3H, d,  $J$  = 6.8 Hz, Me), 1.95–2.03 (1H, m,  $\text{CHMe}_2$ ), 3.81 (3H, s, OMe), 4.17–4.23 (2H, m, oxazoline), 4.25 (5H, s,  $\text{C}_5\text{H}_5$ ), 4.34–4.40 (1H, m, oxazoline), 4.57 (1H, t,  $J$  = 2.6 Hz,  $\text{C}_5\text{H}_3$ ), 4.91 (1H, dd,  $J$  = 2.0, 2.6 Hz,  $\text{C}_5\text{H}_3$ ), 5.43 (1H, dd,  $J$  = 2.0, 2.6 Hz,  $\text{C}_5\text{H}_3$ ), 6.89 (2H, d,  $J$  = 9.0 Hz, aromatic CH), 7.66 (2H, d,  $J$  = 9.0 Hz, aromatic CH), 13.12 (1H, s, NH);  $^{13}\text{C}\{^1\text{H}\}$  NMR (99.54 MHz,  $\text{CDCl}_3$ , 24.8 °C):  $\delta$  18.1 (Me), 18.9 (Me), 32.3 (CH), 55.5 (OMe), 66.3 ( $\text{C}_5\text{H}_3$ ), 69.5 ( $\text{CH}_2$  oxazoline), 71.1 (CH oxazoline), 71.4 ( $\text{C}_5\text{H}_5$ ), 72.0 ( $\text{C}_5\text{H}_3$ ), 74.4 ( $\text{C}_5\text{H}_3$ ), 76.3 ( $\text{C}_5\text{H}_3$ ), 114.0 (aromatic), 121.8 (aromatic), 133.0 (aromatic), 155.7 (aromatic), 167.1 (CON), 168.0 (CON) (one carbon signal was not detected due to overlapping with solvent peak); IR ( $\text{CH}_2\text{Cl}_2$  cast film): 2963, 1647, 1511, 1242, 749  $\text{cm}^{-1}$ ; HRMS-ESI ( $m/z$ ):  $[\text{M} + \text{H}]^+$  calcd for  $\text{C}_{24}\text{H}_{27}\text{FeN}_2\text{O}_3$ , 445.1418; found: 445.1422;  $[\alpha]_{\text{D}}^{23}$  –52.47 ( $c$  0.46,  $\text{CHCl}_3$ ).

**(S)-1-[(4-Chlorophenyl)amino]carbonyl]-2-[(4S)-4,5-dihydro-4-isopropyl-2-oxazolyl]ferrocene (3c).** Red solid. Mp 177–180 °C;  $^1\text{H}$  NMR (399.78 MHz,  $\text{CDCl}_3$ , 23.9 °C):  $\delta$  1.06 (3H, d,  $J$  = 6.8 Hz, Me), 1.10 (3H, d,  $J$  = 6.8 Hz, Me), 1.95–2.07 (1H, m,  $\text{CHMe}_2$ ), 4.18–4.24 (2H, m, oxazoline), 4.27 (5H, s,  $\text{C}_5\text{H}_5$ ), 4.34–4.43 (1H, m, oxazoline), 4.62 (1H, t,  $J$  = 2.6 Hz,  $\text{C}_5\text{H}_3$ ), 4.95 (1H, t,  $J$  = 2.2 Hz,  $\text{C}_5\text{H}_3$ ), 5.44 (1H, t,  $J$  = 2.2 Hz,  $\text{C}_5\text{H}_3$ ), 7.32 (2H, d,  $J$  = 8.9 Hz, aromatic CH), 7.73 (2H, d,  $J$  = 8.9 Hz, aromatic CH), 13.38 (1H, s, NH);  $^{13}\text{C}\{^1\text{H}\}$  NMR (99.54 MHz,  $\text{CDCl}_3$ , 24.1 °C):  $\delta$  18.0 (Me), 19.0 (Me), 32.3 (CH), 66.3 ( $\text{C}_5\text{H}_3$ ), 69.5 ( $\text{CH}_2$  oxazoline), 71.4 (CH oxazoline), 71.5 ( $\text{C}_5\text{H}_5$ ), 71.9 ( $\text{C}_5\text{H}_3$ ), 74.7 ( $\text{C}_5\text{H}_3$ ), 76.4 ( $\text{C}_5\text{H}_3$ ), 121.4 (aromatic), 128.1 (aromatic), 128.7 (aromatic), 138.3 (aromatic), 167.6 (CON), 168.1 (CON) (one carbon signal was not detected due to overlapping with solvent peak); IR ( $\text{CH}_2\text{Cl}_2$  cast film): 2971, 1646, 1493, 1146, 828  $\text{cm}^{-1}$ ;

HRMS-ESI ( $m/z$ ):  $[M + H]^+$  calcd for  $C_{23}H_{24}ClFeN_2O_2$ , 449.0922; found: 449.0916;  $[\alpha]_D^{23}$   $-98.95$  ( $c$  0.68,  $CHCl_3$ ).

**(S)-1-[(4S)-4,5-Dihydro-4-isopropyl-2-oxazolyl]-2-[(phenylmethyl)amino]carbonylferrocene (3d).** Red oil.  $^1H$  NMR (399.78 MHz,  $CDCl_3$ , 23.9 °C):  $\delta$  0.86 (3H, d,  $J$  = 6.8 Hz, Me), 0.88 (3H, d,  $J$  = 6.8 Hz, Me), 1.66 (1H, dsept,  $J$  = 5.9, 6.8 Hz,  $CHMe_2$ ), 3.96 (1H, ddd,  $J$  = 5.9, 8.0, 9.5 Hz, oxazoline), 4.08 (1H, dd,  $J$  = 8.0, 8.0 Hz, oxazoline), 4.17 (5H, s,  $C_5H_5$ ), 4.29–4.33 (1H, m, oxazoline), 4.47 (1H, dd,  $J$  = 5.2, 14.7 Hz, Bn), 4.52 (1H, t,  $J$  = 2.7 Hz,  $C_5H_3$ ), 4.72 (1H, dd,  $J$  = 5.7, 14.7 Hz, Bn), 4.85 (1H, dd,  $J$  = 1.9, 2.7 Hz,  $C_5H_3$ ), 5.37 (1H, t,  $J$  = 1.9 Hz,  $C_5H_3$ ), 7.24 (1H, t,  $J$  = 7.5 Hz, aromatic CH), 7.32 (2H, t,  $J$  = 7.5 Hz, aromatic CH), 7.40 (2H, d,  $J$  = 7.5 Hz, aromatic CH), 11.74 (1H, brs, NH);  $^{13}C\{^1H\}$  NMR (99.54 MHz,  $CDCl_3$ , 24.2 °C):  $\delta$  18.4 (Me  $\times$  2), 32.3 (CH), 43.6 (Bn), 66.7 ( $C_5H_3$ ), 69.8 ( $CH_2$  oxazoline), 70.9 (CH oxazoline), 71.3 ( $C_5H_5$ ), 72.1 ( $C_5H_3$ ), 74.3 ( $C_5H_3$ ), 76.1 ( $C_5H_3$ ), 76.5 ( $C_5H_3$ ), 126.9 (aromatic), 127.9 (aromatic), 128.4 (aromatic), 139.6 (aromatic), 167.5 (CON), 168.9 (CON); IR ( $CH_2Cl_2$  cast film): 2960, 1648, 1296, 1007, 749  $cm^{-1}$ ; HRMS-ESI ( $m/z$ ):  $[M + H]^+$  calcd for  $C_{24}H_{27}FeN_2O_2$ , 429.1469; found: 429.1450;  $[\alpha]_D^{23}$   $-73.16$  ( $c$  0.57,  $CHCl_3$ ).

**(S)-1-[(*n*-Butylamino)carbonyl]-2-[(4S)-4,5-dihydro-4-isopropyl-2-oxazolyl]ferrocene (3e).** Brownish-red oil.  $^1H$  NMR (399.78 MHz,  $CDCl_3$ , 26.2 °C):  $\delta$  0.96 (3H, d,  $J$  = 7.4 Hz, Me Bu), 1.04 (3H, d,  $J$  = 6.8 Hz, Me *i*-Pr), 1.08 (3H, d,  $J$  = 6.8 Hz, Me *i*-Pr), 1.39–1.48 (2H, m,  $CH_2$  Bu), 1.55–1.65 (2H, m,  $CH_2$  Bu), 1.83–1.91 (1H, m,  $CHMe_2$ ), 3.31–3.51 (2H, m,  $NCH_2$ ), 4.03–4.15 (2H, m, oxazoline), 4.19 (5H, s,  $C_5H_5$ ), 4.34 (1H, dd,  $J$  = 8.4, 9.6 Hz, oxazoline), 4.49 (1H, t,  $J$  = 2.7 Hz,  $C_5H_3$ ), 4.84 (1H, t,  $J$  = 2.3 Hz,  $C_5H_3$ ), 5.34 (1H, t,  $J$  = 2.2 Hz,  $C_5H_3$ ), 11.14 (1H, s, NH);  $^{13}C\{^1H\}$  NMR (99.54 MHz,  $CDCl_3$ , 26.7 °C):  $\delta$  13.9 ( $CH_2Me$ ), 18.6 ( $CHMe$ ), 18.7 ( $CHMe$ ), 20.4 ( $CH_2$ ), 31.9 (CH), 32.5 ( $CH_2$ ), 39.3 ( $CH_2$ ), 66.6 ( $C_5H_3$ ), 69.7 ( $CH_2$  oxazoline), 70.7 (CH oxazoline), 71.3 ( $C_5H_5$ ), 72.3 ( $C_5H_3$ ), 74.2 ( $C_5H_3$ ), 76.0 ( $C_5H_3$ ), 167.5 (CON), 168.7 (CON) (one carbon signal was not detected due to overlapping with solvent peak); IR ( $CH_2Cl_2$  cast film): 2959, 1648, 1297, 1180, 749  $cm^{-1}$ ; HRMS-FAB ( $m/z$ ):  $[M + H]^+$  calcd for  $C_{21}H_{29}FeN_2O_2$ , 397.1579; found: 397.1567;  $[\alpha]_D^{33}$  19.61 ( $c$  1.43,  $CHCl_3$ ).

**(S)-1-[(Cyclohexylamino)carbonyl]-2-[(4S)-4,5-dihydro-4-isopropyl-2-oxazolyl]ferrocene (3f).** Red oil.  $^1H$  NMR (399.78 MHz,  $CDCl_3$ , 23.9 °C):  $\delta$  1.05 (3H, d,  $J$  = 6.8 Hz, Me), 1.08 (3H, d,  $J$  = 6.8 Hz, Me), 1.10–1.50 (10H, m, Cy), 2.05–2.14 (1H, m,  $CHMe_2$ ), 3.91–4.02 (1H, m, Cy), 4.11–4.14 (2H, m, oxazoline), 4.20 (5H, s,  $C_5H_5$ ), 4.27–4.33 (1H, m, oxazoline), 4.48 (1H, t,  $J$  = 2.7 Hz,  $C_5H_3$ ), 4.82 (1H, t,  $J$  = 2.3 Hz,  $C_5H_3$ ), 5.34 (1H, t,  $J$  = 2.2 Hz,  $C_5H_3$ ), 11.00 (1H, s, NH);  $^{13}C\{^1H\}$  NMR (99.54 MHz,  $CDCl_3$ , 24.2 °C):  $\delta$  18.1 (Me), 18.9 (Me), 25.2 (Cy), 25.3 (Cy), 25.9 (Cy), 32.0 (CH), 32.9 (Cy), 33.8 (Cy), 48.5 (Cy), 66.6 ( $C_5H_3$ ), 69.1 ( $CH_2$  oxazoline), 70.7 (CH oxazoline), 71.4 ( $C_5H_5$ ), 72.2 ( $C_5H_3$ ), 74.2 ( $C_5H_3$ ), 76.1 ( $C_5H_3$ ), 77.2 ( $C_5H_3$ ),

167.5 (CON), 167.6 (CON); IR (CH<sub>2</sub>Cl<sub>2</sub> cast film): 2926, 1645, 1582, 1449, 1002 cm<sup>-1</sup>; HRMS-ESI (*m/z*): [M + H]<sup>+</sup> calcd for C<sub>23</sub>H<sub>31</sub>FeN<sub>2</sub>O<sub>2</sub>, 421.1782; found: 421.1792; [ $\alpha$ ]<sub>D</sub><sup>23</sup> -74.27 (*c* 0.83, CHCl<sub>3</sub>).

### Crystal structure of 3c

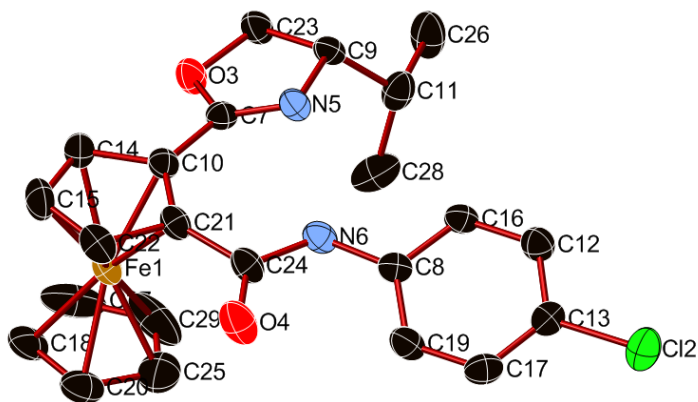

**Figure S1:** Perspective view of molecule **3c** showing the atom labeling scheme. Non-hydrogen atoms are represented by Gaussian ellipsoids at the 50% probability level.

#### A. Crystal Data

|                      |                                                                                                                             |
|----------------------|-----------------------------------------------------------------------------------------------------------------------------|
| Empirical Formula    | C <sub>23</sub> H <sub>23</sub> ClFeN <sub>2</sub> O <sub>2</sub>                                                           |
| Formula Weight       | 450.75                                                                                                                      |
| Crystal Color, Habit | red, block                                                                                                                  |
| Crystal Dimensions   | 0.600 × 0.500 × 0.250 mm                                                                                                    |
| Crystal System       | orthorhombic                                                                                                                |
| Lattice Type         | Primitive                                                                                                                   |
| Lattice Parameters   | $a = 9.7263(6) \text{ \AA}$<br>$b = 12.2692(7) \text{ \AA}$<br>$c = 17.168(2) \text{ \AA}$<br>$V = 2048.7(3) \text{ \AA}^3$ |
| Space Group          | P2 <sub>1</sub> 2 <sub>1</sub> 2 <sub>1</sub> (#19)                                                                         |
| Z value              | 4                                                                                                                           |
| D <sub>calc</sub>    | 1.461 g/cm <sup>3</sup>                                                                                                     |
| F <sub>000</sub>     | 936.00                                                                                                                      |
| μ(MoKα)              | 8.876 cm <sup>-1</sup>                                                                                                      |

## B. Intensity Measurements

|                                                           |                                                                                   |
|-----------------------------------------------------------|-----------------------------------------------------------------------------------|
| Diffractometer                                            | R-AXIS RAPID                                                                      |
| Radiation                                                 | MoK $\alpha$ ( $\lambda = 0.71075$ Å)<br>graphite monochromated                   |
| Voltage, Current                                          | 50 kV, 40 mA                                                                      |
| Temperature                                               | -100.0 °C                                                                         |
| Detector Aperture                                         | 280 $\times$ 256 mm                                                               |
| Data Images                                               | 44 exposures                                                                      |
| $\omega$ oscillation Range ( $\chi=45.0$ , $\phi=0.0$ )   | 130.0 - 190.0°                                                                    |
| Exposure Rate                                             | 60.0 sec./°                                                                       |
| $\omega$ oscillation Range ( $\chi=45.0$ , $\phi=180.0$ ) | 0.0 - 160.0°                                                                      |
| Exposure Rate                                             | 60.0 sec./°                                                                       |
| Detector Position                                         | 127.40 mm                                                                         |
| Pixel Size                                                | 0.100 mm                                                                          |
| $2\theta_{\text{max}}$                                    | 54.9°                                                                             |
| No. of Reflections Measured                               | Total: 19307<br>Unique: 4664 ( $R_{\text{int}} = 0.0354$ )<br>Friedel pairs: 2014 |
| Corrections                                               | Lorentz-polarization<br>Absorption (trans. factors: 0.745 - 0.801)                |

## Data reduction methods

Of the 19307 reflections that were collected, 4664 were unique ( $R_{\text{int}} = 0.0354$ ); equivalent reflections were merged. The linear absorption coefficient,  $\mu$ , for Mo-K $\alpha$  radiation is 8.876 cm<sup>-1</sup>. A numerical absorption correction was applied which resulted in transmission factors ranging from 0.745 to 0.801. The data were corrected for Lorentz and polarization effects.

## Structure solution and refinement methods

The structure was solved by direct methods [3] and expanded using Fourier techniques. The non-hydrogen atoms were refined anisotropically. Hydrogen atoms were refined using the riding model. The final cycle of full-matrix least-squares refinement [4] on  $F^2$  was based on 4664 observed reflections and 298 variable

parameters and converged (largest parameter shift was 0.00 times its esd) with unweighted and weighted agreement factors of:

$$R1 = \Sigma ||F_o| - |F_c|| / \Sigma |F_o| = 0.0304$$

$$wR2 = [ \Sigma ( w (F_o^2 - F_c^2)^2 ) / \Sigma w(F_o^2)^2 ]^{1/2} = 0.0753$$

The standard deviation of an observation of unit weight [5] was 1.03. Unit weights were used. The maximum and minimum peaks on the final difference Fourier map corresponded to 0.46 and -0.20 e<sup>-</sup>/Å<sup>3</sup>, respectively. The absolute structure was deduced based on the Flack parameter, 0.003(12), by using 2014 Friedel pairs [6]. Neutral atom scattering factors were taken from Cromer and Waber [7]. Anomalous dispersion effects were included in F<sub>calc</sub> [8]; the values for Δf' and Δf'' were those of Creagh and McAuley [9]. The values for the mass attenuation coefficients are those of Creagh and Hubbell [10]. All calculations were performed by using the CrystalStructure [11] crystallographic software package except for refinement, which was performed using SHELXL-97 [12].

### C. Structure solution and refinement

|                                        |                                                                                                                        |
|----------------------------------------|------------------------------------------------------------------------------------------------------------------------|
| Structure Solution                     | Direct Methods (SIR92)                                                                                                 |
| Refinement                             | Full-matrix least-squares on F <sup>2</sup>                                                                            |
| Function Minimized                     | $\Sigma w (F_o^2 - F_c^2)^2$                                                                                           |
| Least Squares Weights                  | $w = 1 / [ \sigma^2(F_o^2) + (0.0500 \cdot P)^2 + 0.0000 \cdot P ]$<br>where $P = (\text{Max}(F_o^2, 0) + 2F_c^2) / 3$ |
| $2\theta_{\text{max}}^{\text{cutoff}}$ | 54.9°                                                                                                                  |
| Anomalous Dispersion                   | All non-hydrogen atoms                                                                                                 |
| No. Observations (All reflections)     | 4664                                                                                                                   |
| No. Variables                          | 298                                                                                                                    |
| Reflection/Parameter Ratio             | 15.65                                                                                                                  |
| Residuals: R1 (I>2.00σ(I))             | 0.0304                                                                                                                 |
| Residuals: R (All reflections)         | 0.0343                                                                                                                 |
| Residuals: wR2 (All reflections)       | 0.0753                                                                                                                 |
| Goodness of Fit Indicator              | 1.027                                                                                                                  |
| Flack Parameter (Friedel pairs = 2014) | 0.003(12)                                                                                                              |
| Max Shift/Error in Final Cycle         | 0.004                                                                                                                  |
| Maximum peak in Final Diff. Map        | 0.46 e <sup>-</sup> /Å <sup>3</sup>                                                                                    |
| Minimum peak in Final Diff. Map        | -0.20 e <sup>-</sup> /Å <sup>3</sup>                                                                                   |



**Table S1: Bond lengths (Å).**

| atom | atom | distance   | atom | atom | distance   |
|------|------|------------|------|------|------------|
| Fe1  | C10  | 2.0381(19) | Fe1  | C14  | 2.044(3)   |
| Fe1  | C15  | 2.053(3)   | Fe1  | C18  | 2.042(2)   |
| Fe1  | C20  | 2.033(3)   | Fe1  | C21  | 2.0368(18) |
| Fe1  | C22  | 2.042(3)   | Fe1  | C25  | 2.037(3)   |
| Fe1  | C27  | 2.040(3)   | Fe1  | C29  | 2.030(4)   |
| Cl2  | C13  | 1.748(2)   | O3   | C7   | 1.358(3)   |
| O3   | C23  | 1.463(3)   | O4   | C24  | 1.223(3)   |
| N5   | C7   | 1.272(3)   | N5   | C9   | 1.478(3)   |
| N6   | C8   | 1.403(3)   | N6   | C24  | 1.358(3)   |
| C7   | C10  | 1.464(3)   | C8   | C16  | 1.394(3)   |
| C8   | C19  | 1.396(3)   | C9   | C11  | 1.531(3)   |
| C9   | C23  | 1.533(3)   | C10  | C14  | 1.430(3)   |
| C10  | C21  | 1.451(3)   | C11  | C26  | 1.532(3)   |
| C11  | C28  | 1.516(4)   | C12  | C13  | 1.380(3)   |
| C12  | C16  | 1.387(3)   | C13  | C17  | 1.380(3)   |
| C14  | C15  | 1.410(4)   | C15  | C22  | 1.417(4)   |
| C17  | C19  | 1.381(3)   | C18  | C20  | 1.397(4)   |
| C18  | C27  | 1.413(4)   | C20  | C25  | 1.393(4)   |
| C21  | C22  | 1.431(3)   | C21  | C24  | 1.496(3)   |
| C25  | C29  | 1.386(6)   | C27  | C29  | 1.418(5)   |

**Table S2: Bond angles (°).**

| atom | atom | atom | angle      | atom | atom | atom | angle      |
|------|------|------|------------|------|------|------|------------|
| C10  | Fe1  | C14  | 41.00(8)   | C10  | Fe1  | C15  | 68.56(8)   |
| C10  | Fe1  | C18  | 158.35(10) | C10  | Fe1  | C20  | 161.28(9)  |
| C10  | Fe1  | C21  | 41.72(8)   | C10  | Fe1  | C22  | 69.01(8)   |
| C10  | Fe1  | C25  | 126.93(10) | C10  | Fe1  | C27  | 124.77(10) |
| C10  | Fe1  | C29  | 111.52(11) | C14  | Fe1  | C15  | 40.27(10)  |
| C14  | Fe1  | C18  | 121.18(11) | C14  | Fe1  | C20  | 154.27(10) |
| C14  | Fe1  | C21  | 69.47(9)   | C14  | Fe1  | C22  | 68.31(10)  |
| C14  | Fe1  | C25  | 165.09(11) | C14  | Fe1  | C27  | 110.32(12) |
| C14  | Fe1  | C29  | 129.04(13) | C15  | Fe1  | C18  | 105.47(11) |
| C15  | Fe1  | C20  | 118.20(10) | C15  | Fe1  | C21  | 68.99(9)   |
| C15  | Fe1  | C22  | 40.49(9)   | C15  | Fe1  | C25  | 153.35(12) |
| C15  | Fe1  | C27  | 124.75(13) | C15  | Fe1  | C29  | 163.65(13) |
| C18  | Fe1  | C20  | 40.11(11)  | C18  | Fe1  | C21  | 157.54(9)  |
| C18  | Fe1  | C22  | 120.79(10) | C18  | Fe1  | C25  | 67.68(12)  |
| C18  | Fe1  | C27  | 40.49(11)  | C18  | Fe1  | C29  | 68.12(12)  |
| C20  | Fe1  | C21  | 121.86(9)  | C20  | Fe1  | C22  | 104.12(10) |
| C20  | Fe1  | C25  | 40.03(12)  | C20  | Fe1  | C27  | 67.52(11)  |
| C20  | Fe1  | C29  | 67.29(13)  | C21  | Fe1  | C22  | 41.08(8)   |
| C21  | Fe1  | C25  | 106.99(11) | C21  | Fe1  | C27  | 159.80(11) |
| C21  | Fe1  | C29  | 122.73(11) | C22  | Fe1  | C25  | 119.17(11) |

**Table S2: Bond angles (°) (continued).**

| atom | atom | atom | angle      | atom | atom | atom | angle      |
|------|------|------|------------|------|------|------|------------|
| C22  | Fe1  | C27  | 158.88(12) | C22  | Fe1  | C29  | 155.80(13) |
| C25  | Fe1  | C27  | 67.72(14)  | C25  | Fe1  | C29  | 39.85(15)  |
| C27  | Fe1  | C29  | 40.79(15)  | C7   | O3   | C23  | 105.51(14) |
| C7   | N5   | C9   | 107.87(15) | C8   | N6   | C24  | 126.94(16) |
| O3   | C7   | N5   | 118.04(16) | O3   | C7   | C10  | 114.94(16) |
| N5   | C7   | C10  | 126.94(17) | N6   | C8   | C16  | 117.35(16) |
| N6   | C8   | C19  | 124.04(18) | C16  | C8   | C19  | 118.61(18) |
| N5   | C9   | C11  | 111.59(15) | N5   | C9   | C23  | 103.49(14) |
| C11  | C9   | C23  | 115.19(16) | Fe1  | C10  | C7   | 131.00(13) |
| Fe1  | C10  | C14  | 69.73(12)  | Fe1  | C10  | C21  | 69.09(10)  |
| C7   | C10  | C14  | 121.65(18) | C7   | C10  | C21  | 130.44(17) |
| C14  | C10  | C21  | 107.65(17) | C9   | C11  | C26  | 109.61(17) |
| C9   | C11  | C28  | 112.47(19) | C26  | C11  | C28  | 111.59(19) |
| C13  | C12  | C16  | 119.02(19) | C12  | C13  | C12  | 119.40(15) |
| C12  | C13  | C17  | 119.72(15) | C12  | C13  | C17  | 120.87(18) |
| Fe1  | C14  | C10  | 69.27(12)  | Fe1  | C14  | C15  | 70.19(13)  |
| C10  | C14  | C15  | 108.4(2)   | Fe1  | C15  | C14  | 69.54(13)  |
| Fe1  | C15  | C22  | 69.33(13)  | C14  | C15  | C22  | 108.4(2)   |
| C8   | C16  | C12  | 121.10(18) | C13  | C17  | C19  | 120.04(18) |
| Fe1  | C18  | C20  | 69.59(13)  | Fe1  | C18  | C27  | 69.68(15)  |
| C20  | C18  | C27  | 107.3(3)   | C8   | C19  | C17  | 120.32(19) |
| Fe1  | C20  | C18  | 70.30(14)  | Fe1  | C20  | C25  | 70.14(15)  |
| C18  | C20  | C25  | 109.0(3)   | Fe1  | C21  | C10  | 69.19(11)  |
| Fe1  | C21  | C22  | 69.64(12)  | Fe1  | C21  | C24  | 122.73(13) |
| C10  | C21  | C22  | 106.62(17) | C10  | C21  | C24  | 133.66(17) |
| C22  | C21  | C24  | 119.59(18) | Fe1  | C22  | C15  | 70.18(13)  |
| Fe1  | C22  | C21  | 69.27(12)  | C15  | C22  | C21  | 108.83(19) |
| O3   | C23  | C9   | 104.76(15) | O4   | C24  | N6   | 123.91(19) |
| O4   | C24  | C21  | 119.34(18) | N6   | C24  | C21  | 116.75(17) |
| Fe1  | C25  | C20  | 69.84(15)  | Fe1  | C25  | C29  | 69.79(19)  |
| C20  | C25  | C29  | 108.2(3)   | Fe1  | C27  | C18  | 69.83(15)  |
| Fe1  | C27  | C29  | 69.20(19)  | C18  | C27  | C29  | 107.3(3)   |
| Fe1  | C29  | C25  | 70.36(19)  | Fe1  | C29  | C27  | 70.0(2)    |
| C25  | C29  | C27  | 108.2(3)   |      |      |      |            |

**References**

- (1) Takebayashi, S.; Shibata, T. *Organometallics* **2012**, *31*, 4114–4117.
- (2) Boyer, P. M.; Roy, C. P.; Bielski, J. M.; Merola, J. S. *Inorg. Chim. Acta* **1996**, *245*, 7-15.
- (3) SIR92: Altomare, A.; Cascarano, G.; Giacovazzo, C.; Guagliardi, A.; Burla, M.; Polidori, G.; Camalli, M. *J. Appl. Cryst.* **1994**, *27*, 435.
- (4) Flack, H. D. *Acta Cryst.* **1983**, *A39*, 876-881.
- (5) Least Squares function minimized (SHELXL97):  $\sum w(F_o - F_c)^2$  where  $w$  = Least Squares weights.

- (6) Standard deviation of an observation of unit weight:  $[\sum w(F_o - F_c)^2 / (N_o - N_v)]^{1/2}$   
where:  $N_o$  = number of observations,  $N_v$  = number of variables
- (7) *International Tables for X-ray Crystallography*, Cromer, D. T.; Waber, J. T. The Kynoch Press: Birmingham, England, 1974; Vol. IV, Table 2.2 A.
- (8) Ibers, J. A.; Hamilton, W. C. *Acta Crystallogr.* **1964**, *17*, 781.
- (9) *International Tables for Crystallography*, Creagh, D. C.; McAuley, W. J., Wilson A. J. C., Ed.; Kluwer Academic Publishers: Boston, 1992; Vol C, Table 4.2.6.8, pp 219–222.
- (10) *International Tables for Crystallography*, Creagh, D. C.; McAuley, W. J., Wilson, A. J. C., Ed.; Kluwer Academic Publishers: Boston, 1992; Vol C, Table 4.2.4.3, pp 200–206.
- (11) CrystalStructure 4.0: Crystal Structure Analysis Package, Rigaku Corporation (2000–2010). Tokyo Japan, 196-8666.
- (12) SHELX97: Sheldrick, G.M. *Acta Crystallogr.* **2008**, *A64*, 112.
